# Supplementary material for: Alteration of Mitochondrial DNA Copy Number and Increased Expression Levels of Mitochondrial Dynamics-Related Genes in Sjögren’s Syndrome
Source: MDPI journal article supplement (doi:10.3390/biomedicines10112699), 2022-10-25
Supplement: s1 [file s1]

**Table S1. Primer sequences.**

| GENE                                        | PRIMER SEQUENCE (5' --> 3')                                   |
|---------------------------------------------|---------------------------------------------------------------|
| Mitochondrial Fission Factor (MFF)          | FW: GTGTGATAATGCAAGTTCCGG<br>RV: GTTTTCAGTGCCAGGGGT           |
| Mitofusin-1 (MFN1)                          | FW: AGACAAGCTTTCCATCATTGGT<br>RV: TTGATAACAGAGCTCTTCCCAC      |
| Mitochondrial Transcription Factor A (TFAM) | FW: TGTGTATTTACCGAGGTGGTTT<br>RV: AACGCTGGGCAATTCTTCTA        |
| $\beta$ -Actin                              | FW: AAGATGACCCAGATCATGTTTGAGACC<br>RV: ATCCTGCGTCTGGACCTGGCGT |
